# Supplementary material
Source: ML conference proceedings conference paper supplement (https://openreview.net/forum?id=HzMNL_8i5g5)

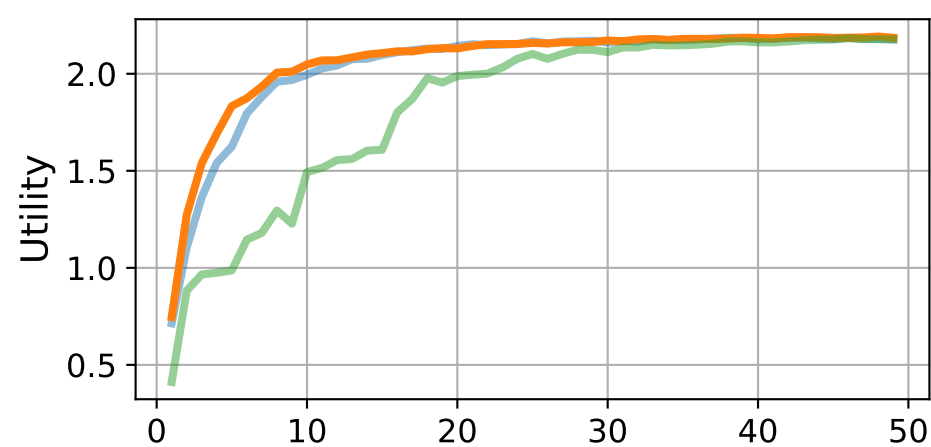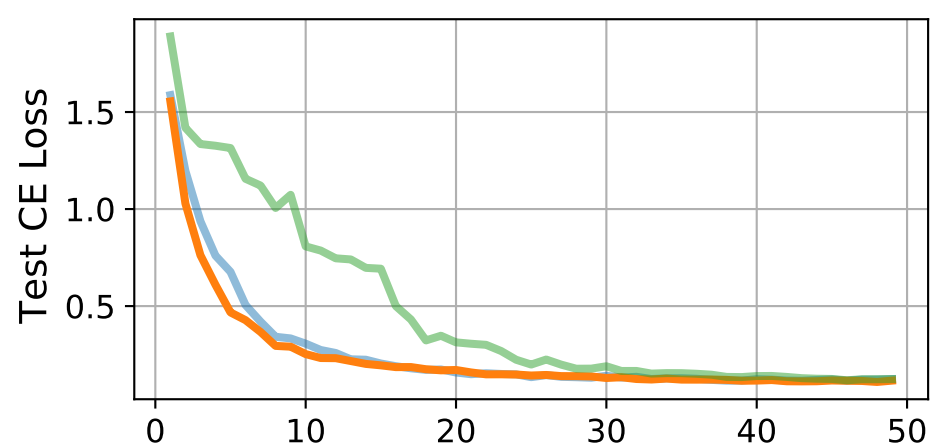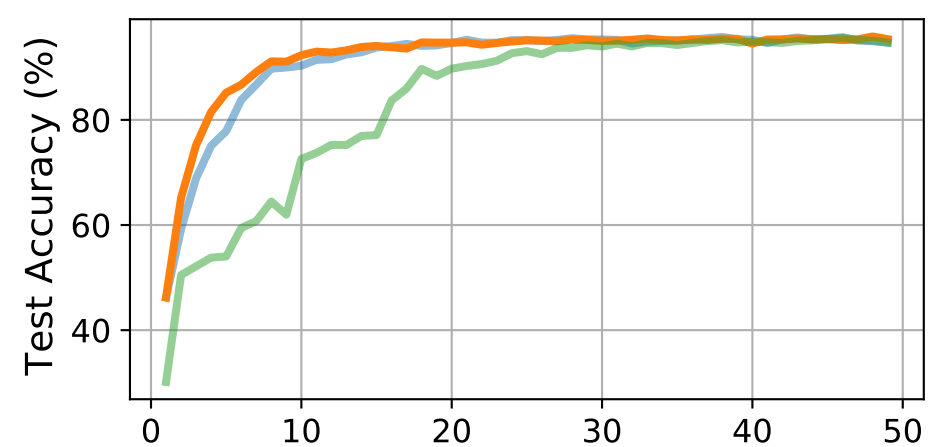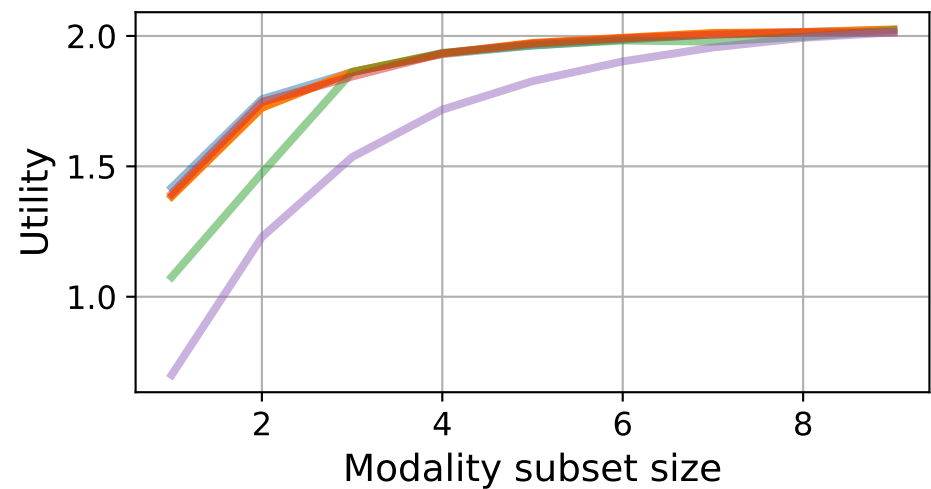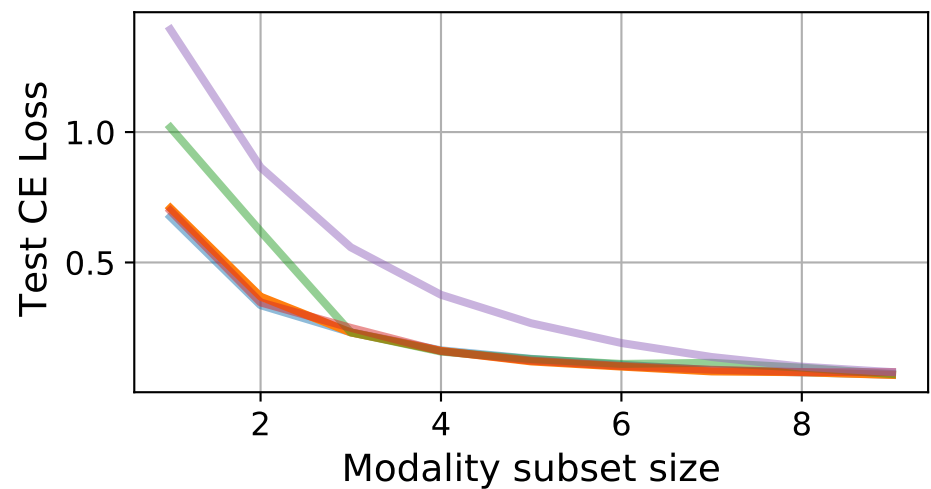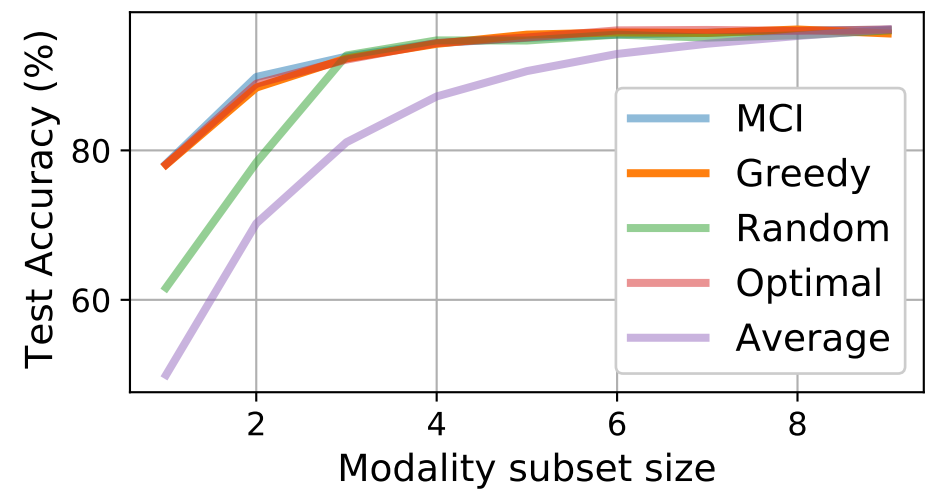

Supplement: supplementary_material [file attachment]

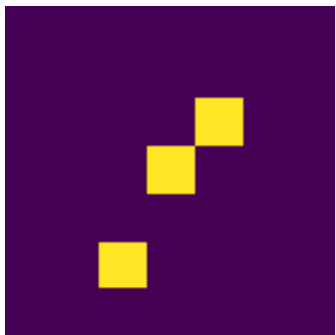

3

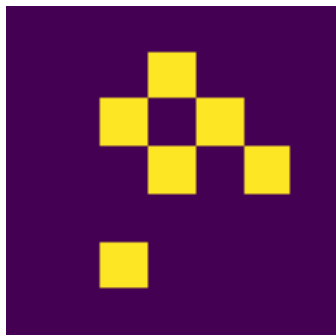

6

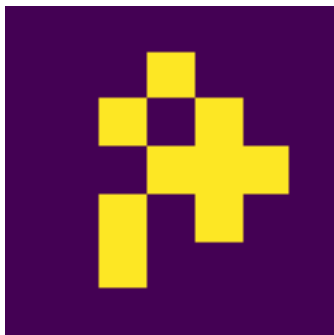

9

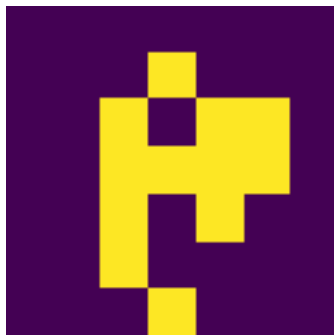

12

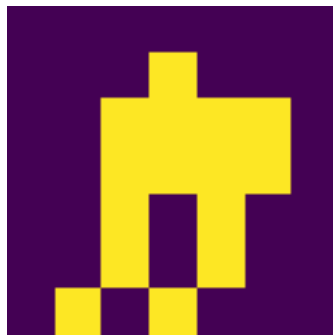

15

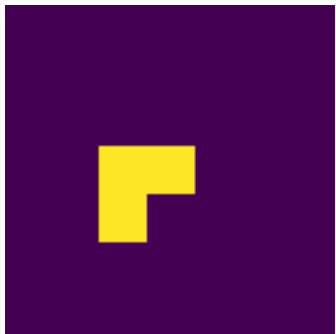

3

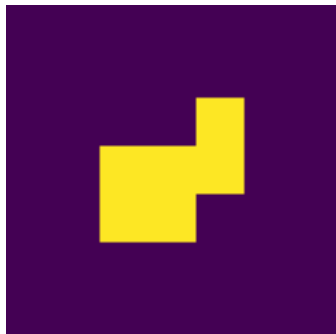

6

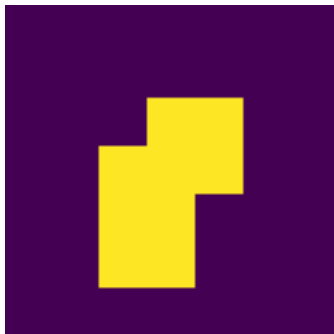

9

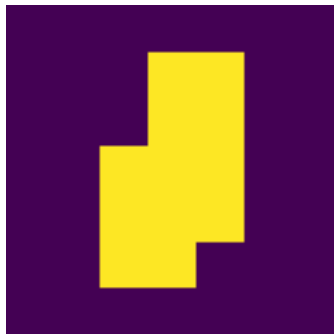

12

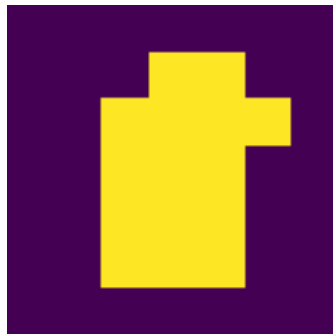

15

Modality subset size

Supplement: supplementary_material [file attachment]

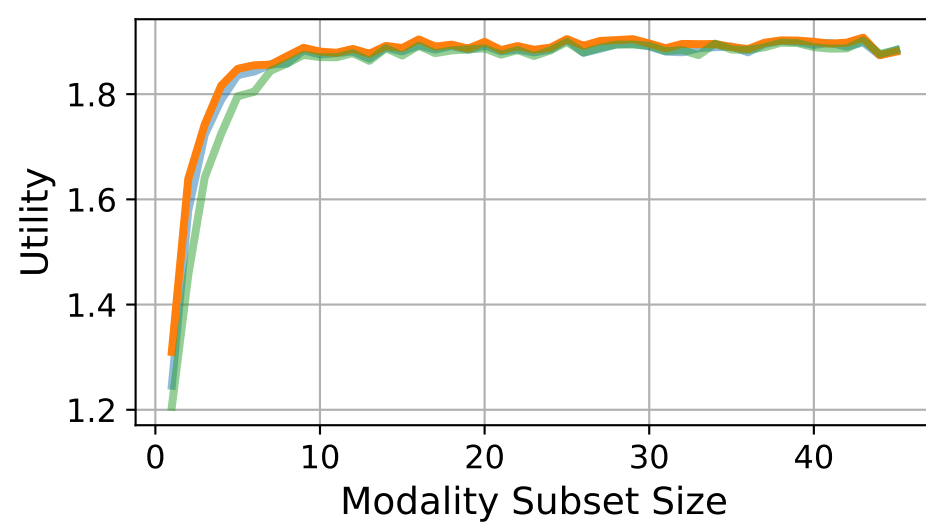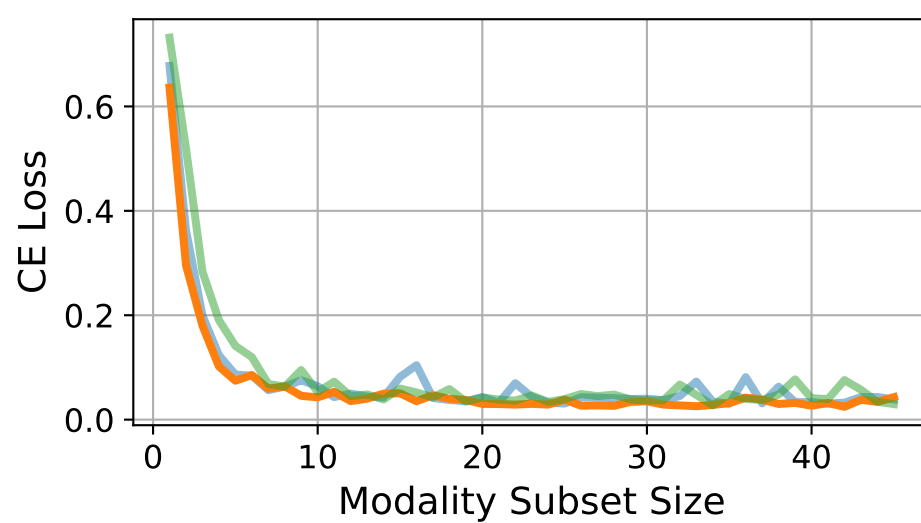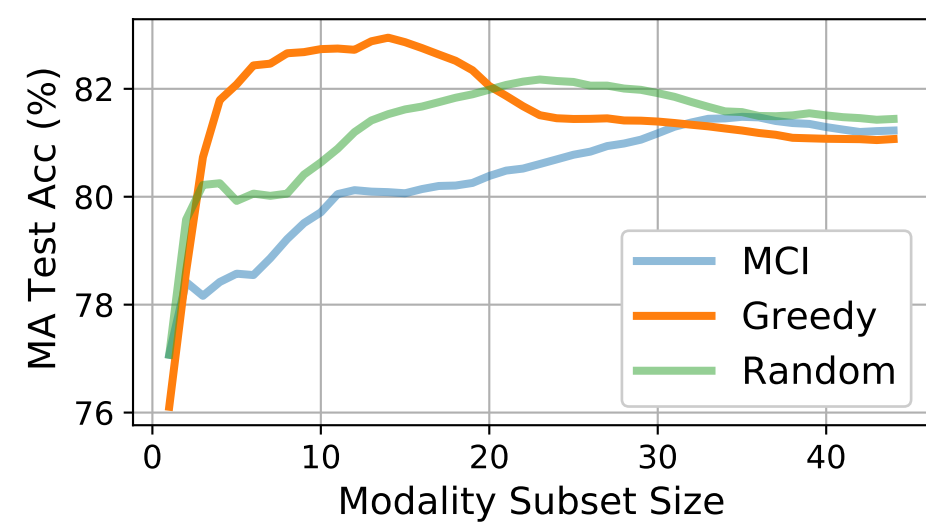

Supplement: supplementary_material [file attachment]

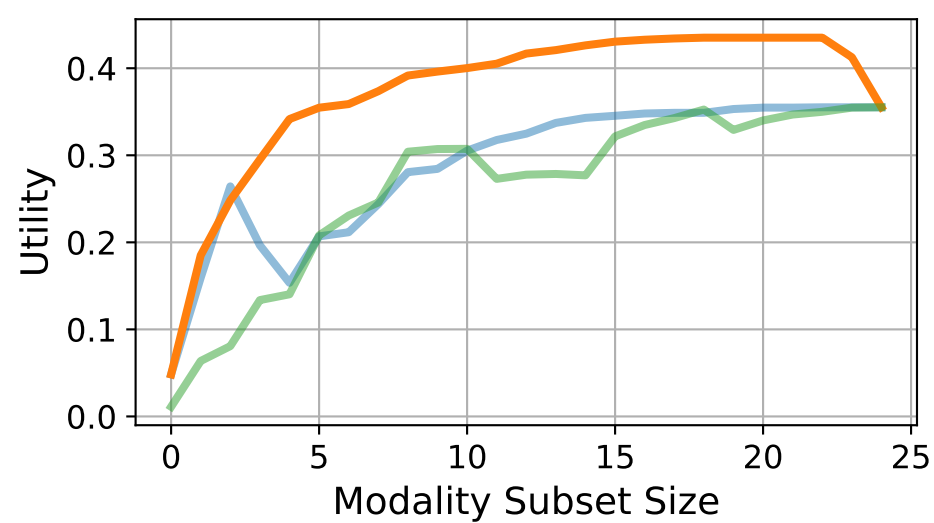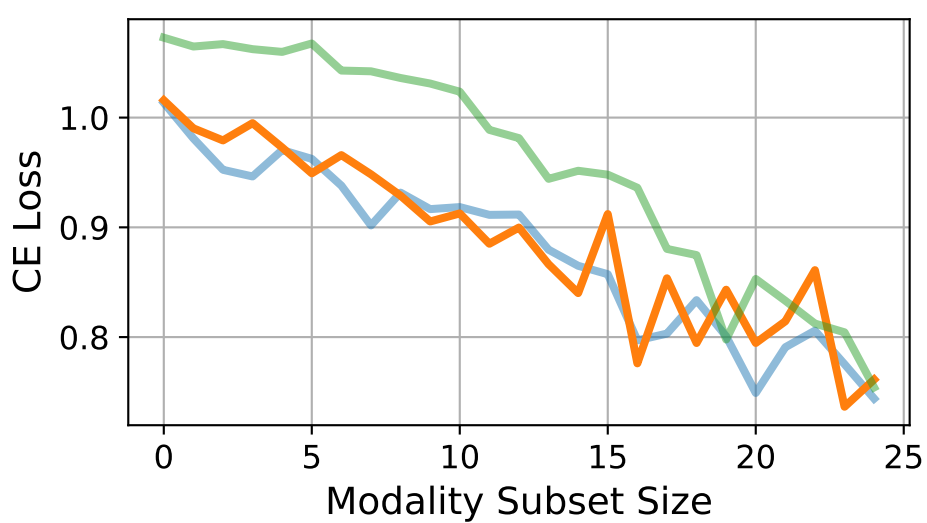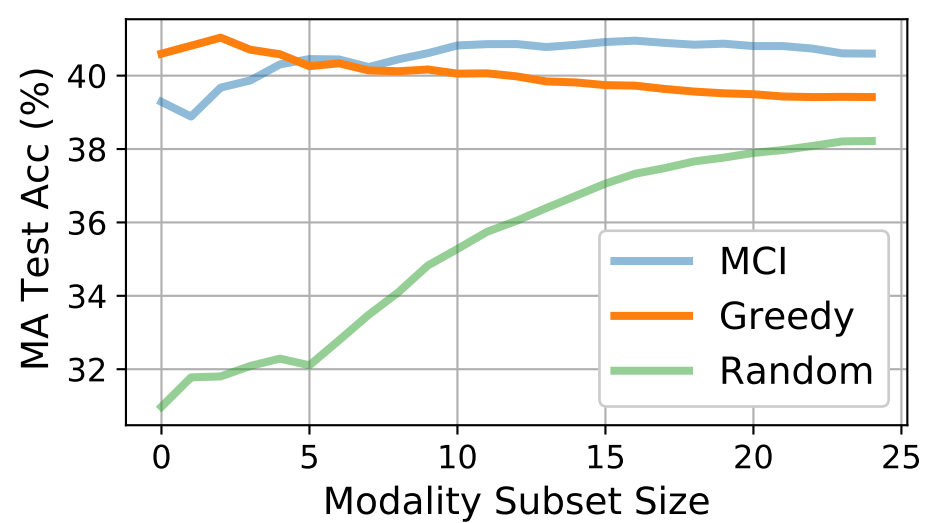

Supplement: supplementary_material [file attachment]
